# Supplementary material for: Development of a glucose oxidase-based biocatalyst adopting both physical entrapment and crosslinking, and its use in biofuel cells
Source: Royal Society of Chemistry journal article supplement (doi:10.1039/c6nr00902f), 2016-01-01
Supplement: c6nr00902f1.pdf [file c6nr00902f1.pdf]

## Supporting Information

### Development of glucose oxidase-based biocatalyst adopting both physical entrapment and crosslinking and its use in biofuel cell

Yongjin Chung<sup>&[a]</sup>, Yeonjoo Ahn<sup>&[a]</sup>, Marcelinus Christwardana<sup>[a]</sup>, Hansung Kim<sup>\*[b]</sup> and Yongchai Kwon<sup>\*\*[a]</sup>

#### Contents

##### I. Tables

Table S1

Table S2

Table S3

##### II. Figures

Figure S1

Figure S2

Figure S3

Figure S4

**Table S1.** Atomic percentage of catalyst's surface measured by XPS

| GOx concentration | Catalyst Structure | Atomic percentage(%) |              |              |
|-------------------|--------------------|----------------------|--------------|--------------|
|                   |                    | C                    | N            | O            |
| 2mg/ml            | GOx/PEI/CNT        | 84.96                | 6.21         | 8.83         |
|                   | GA/[GOx/PEI/CNT]   | 82.13                | 5.33         | <b>12.54</b> |
|                   | TPA/[GOx/PEI/CNT]  | 83.52                | <b>8.31</b>  | 8.17         |
| 4mg/ml            | GOx/PEI/CNT        | 80.36                | 9.19         | 10.44        |
|                   | GA/[GOx/PEI/CNT]   | 77.78                | 9.01         | <b>13.2</b>  |
|                   | TPA/[GOx/PEI/CNT]  | 78.74                | <b>10.56</b> | 10.7         |
| 6mg/ml            | GOx/PEI/CNT        | 77.8                 | 9.67         | 12.52        |
|                   | GA/[GOx/PEI/CNT]   | 76.85                | 9.31         | <b>13.84</b> |
|                   | TPA/[GOx/PEI/CNT]  | 75.62                | <b>11.89</b> | 12.49        |

| GOx concentration | Catalyst Structure | C-C<br>(285 eV) | C-N<br>C=N<br>(286.1 eV) | C-O<br>(287 eV) | C=O<br>(288 eV) | COO<br>(289 eV) |
|-------------------|--------------------|-----------------|--------------------------|-----------------|-----------------|-----------------|
| 2mg/ml            | GOx/PEI/CNT        | 61.1            | 12.2                     | 18.2            | 3.4             | 5.1             |
|                   | GA/[GOx/PEI/CNT]   | 50.5            | 26.7                     | 9.4             | 8.8             | 4.4             |
|                   | TPA/[GOx/PEI/CNT]  | 50.4            | 22.5                     | 15.3            | 6.1             | 4.0             |
| 4mg/ml            | GOx/PEI/CNT        | 53.8            | 12.3                     | 21.7            | 4.0             | 8.0             |
|                   | GA/[GOx/PEI/CNT]   | 43.0            | 19.9                     | 16.9            | 12.2            | 4.4             |
|                   | TPA/[GOx/PEI/CNT]  | 43.5            | 18.5                     | 19.8            | 6.2             | 7.1             |
| 6mg/ml            | GOx/PEI/CNT        | 45.5            | 22.4                     | 12.9            | 13.3            | 4.4             |
|                   | GA/[GOx/PEI/CNT]   | <b>43.0</b>     | 19.0                     | <b>13.6</b>     | <b>22.6</b>     | 1.7             |
|                   | TPA/[GOx/PEI/CNT]  | <b>39.4</b>     | 27.6                     | 11.3            | 15.5            | 6.0             |

**Table S3.** Results of N1s Peak analysis (%)

| GOx concentration | Catalyst Structure | C=N (398.5 eV) | C-N (399.5 eV) |
|-------------------|--------------------|----------------|----------------|
| 2mg/ml            | GOx/PEI/CNT        | 7.6            | 77.6           |
|                   | GA/[GOx/PEI/CNT]   | 8.1            | 78.9           |
|                   | TPA/[GOx/PEI/CNT]  | <b>24.2</b>    | <b>66.5</b>    |
| 4mg/ml            | GOx/PEI/CNT        | 10.1           | 74.2           |
|                   | GA/[GOx/PEI/CNT]   | 12.1           | 73.7           |
|                   | TPA/[GOx/PEI/CNT]  | <b>25.1</b>    | <b>65.5</b>    |
| 6mg/ml            | GOx/PEI/CNT        | 11.7           | 76.7           |
|                   | GA/[GOx/PEI/CNT]   | 14.1           | 67.1           |
|                   | TPA/[GOx/PEI/CNT]  | <b>30.3</b>    | <b>64.4</b>    |

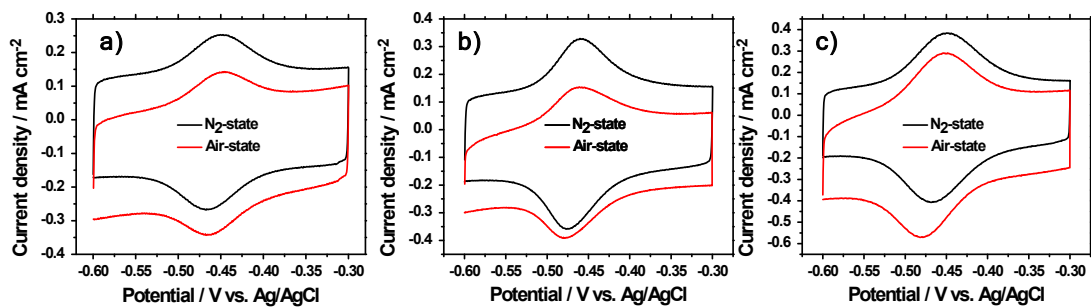

**Fig. S1.** Cyclic voltammograms of a) GOx/PEI/CNT, b) GA/[GOx/PEI/CNT] and c) TPA/[GOx/PEI/CNT] run at air-saturated state and N<sub>2</sub> state without provision of glucose.

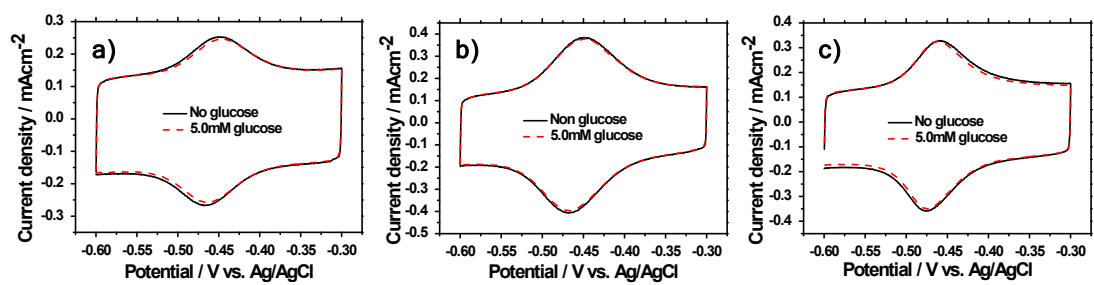

**Fig. S2.** Cyclic voltammograms of a) GOx/PEI/CNT, b) GA/[GOx/PEI/CNT] and c) TPA/[GOx/PEI/CNT] run at N<sub>2</sub> state with provision of 0 and 5 mM glucose.

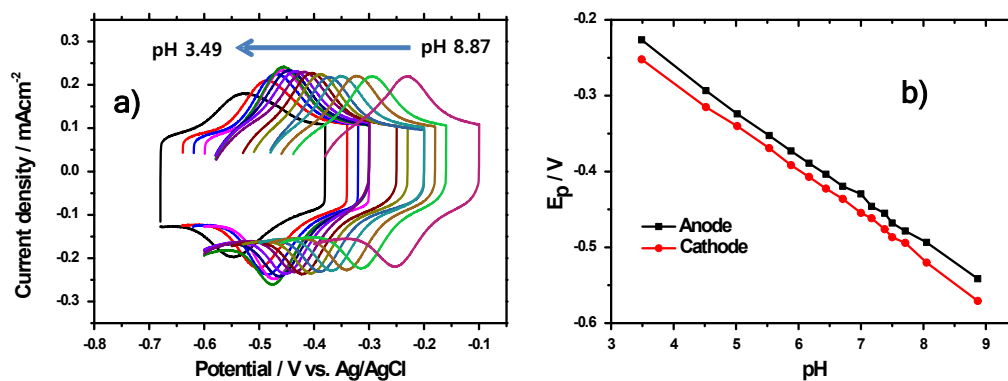

**Fig. S3.** a) Cyclic voltammograms of TPA/[GOx/PEI/CNT] run under the condition of different pHs and b) a relationship between electrolyte pH and its peak potential. For the CV tests, 1.0 M PBS (pH 7.4) was used as electrolyte and potential scan rate was  $50\text{mV s}^{-1}$ , while electrolyte pH was varied from 3.49 to 8.87.

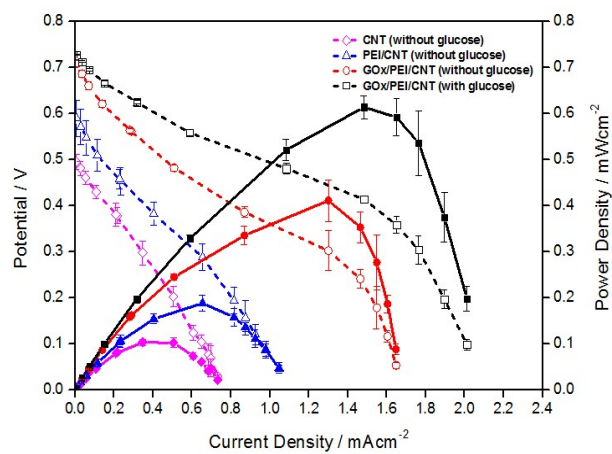

**Fig. S4.** MPDs of EBCs adopting CNT (Pink), PEI/CNT (Blue) and GOx/PEI/CNT (Red) catalysts including GOx concentrations of  $4 \text{ mg}\cdot\text{mL}^{-1}$  without glucose. In the tests,  $0.2 \text{ M}$  glucose solution was fed and circulated as a fuel from an external bottle to the anode chamber of the EBC at a rate of  $60 \text{ mL min}^{-1}$ , while  $50 \text{ cc min}^{-1}$  of  $\text{O}_2$  gas was fed to the cathode.
